# Supplementary material for: Stabilization of S3O4 at High Pressure-Implications for the Sulfur Excess Paradox
Source: Research Square preprint supplement (doi:10.21203/rs.3.rs-125867/v1), 2020-12-29
Supplement: Supplementary file 1 [file f00552bda2c443f87adfc69b.docx]

**Supplemental Material for**

**Stabilization of S3O4 at High Pressure-Implications for the Sulfur Excess Paradox**

Siyu Liu*1*, Jian Lv*1*, ﻿Pengyue Gao*1*, Andreas Hermann*2*, Guochun Yang*3*, ﻿Yanchao Wang*1,**, and Yanming Ma*1,4,**

*1State key laboratory of superhard materials &International center of computational method and software, College of Physics, Jilin University, Changchun 130012, China*

*2Centre for Science at Extreme Conditions and SUPA, School of Physics and Astronomy, The University of Edinburgh, Edinburgh EH9 3FD, United Kingdom*

*3School of Science, Yanshan University, Qinhuangdao 066004, China*

*4International Center of Future Science, Jilin University, Changchun 130012, China*

**
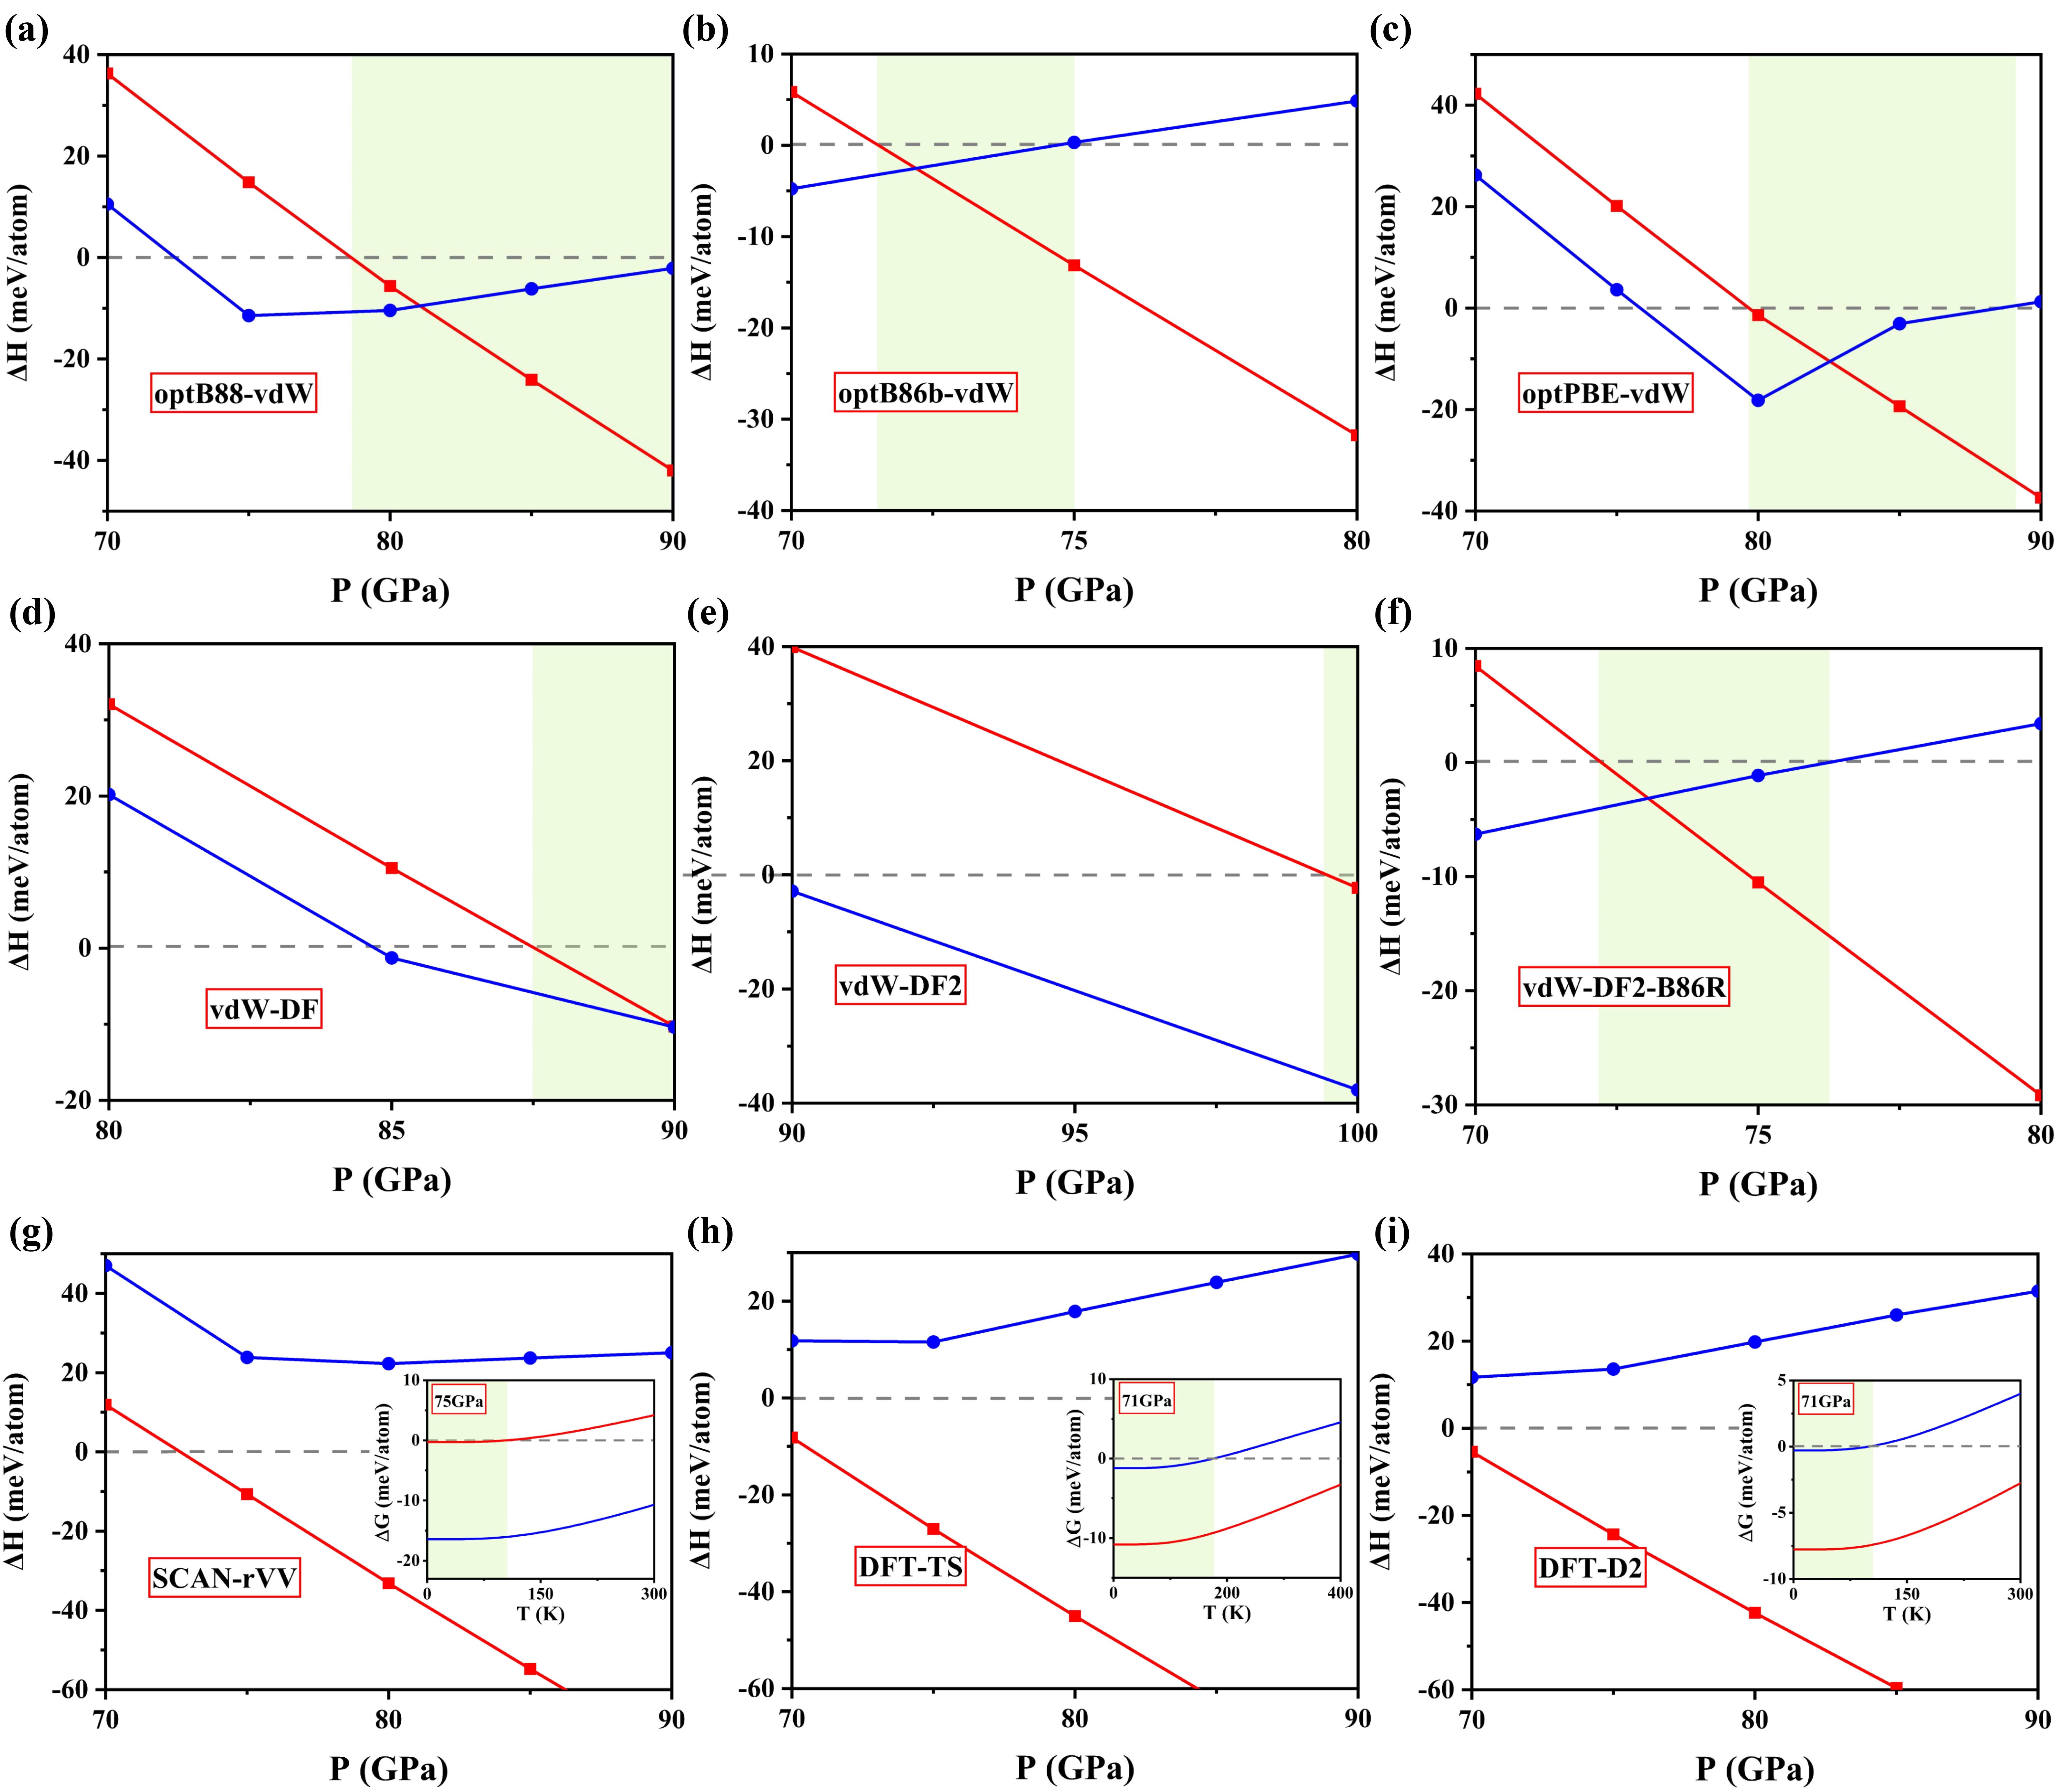
**

**Figure S1.** Relative enthalpies and Gibbs free energy of ﻿proposed reactions for 4SO3+5S→3S3O4 (blue line) and 2SO2+S→S3O4 (red line) with various van der Waals (vdW) methods at high-pressure and high-temperature. Due to the typical layer structure of S3O4, the vdW methods were adopted to include the dispersion interactions. All the calculations reveal that S3O4 is stable at high-pressure and temperature.


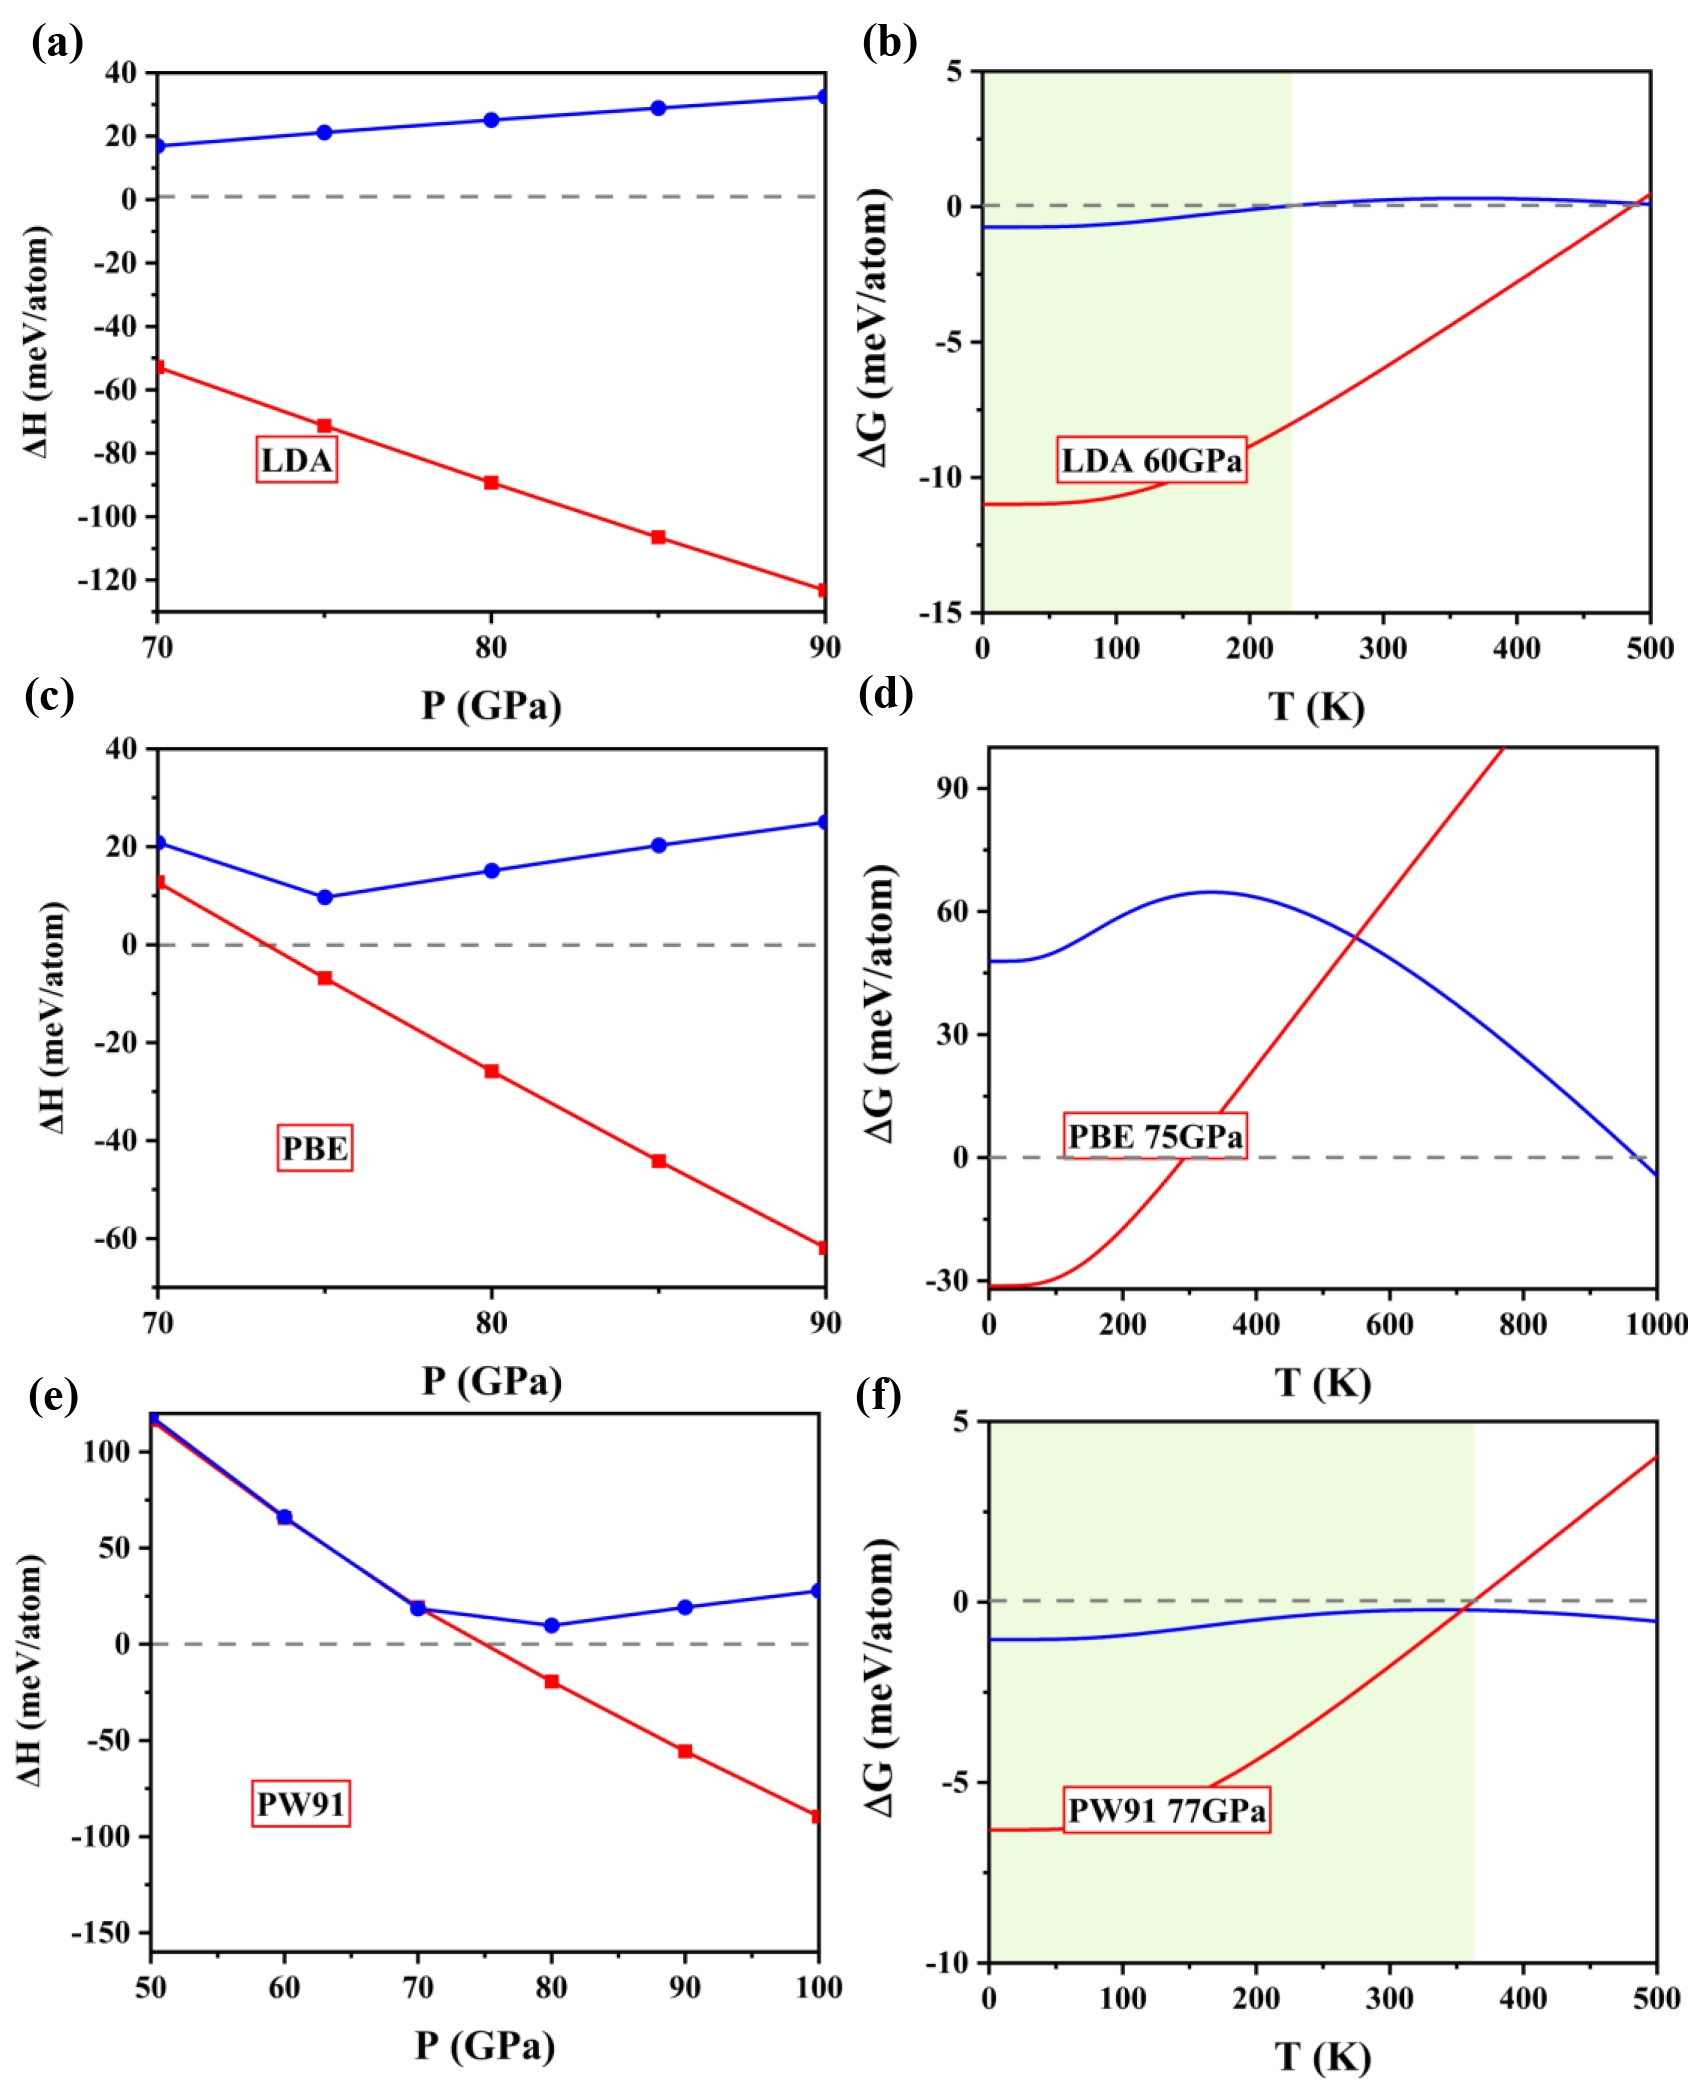


**Figure S2.** Relative enthalpies and Gibbs free energy of ﻿proposed reactions for 4SO3+5S→3S3O4 (blue line) and 2SO2+S→S3O4 (red line) with three different exchange-correlation functionals at high-pressure and high-temperature. The calculations within LDA and PW91 indicate that the S3O4 is stable at high-pressure and high temperature.


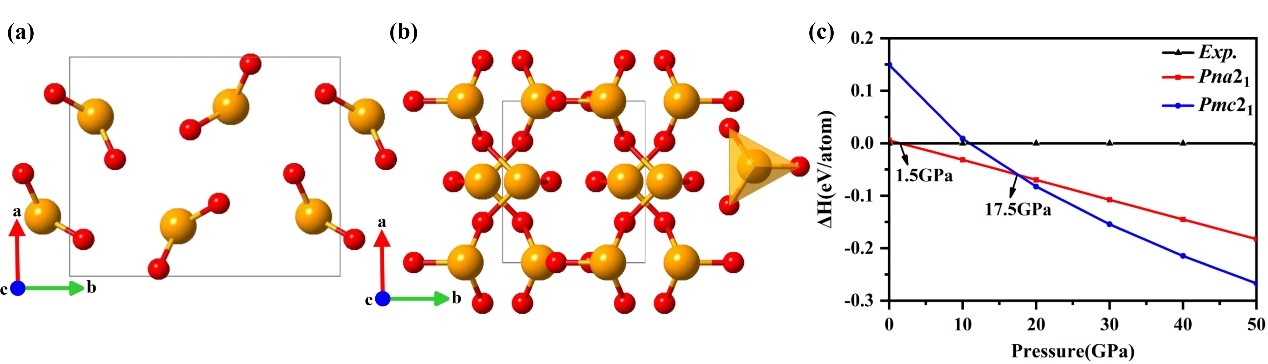


**Figure S3.** (a) Crystal structure of *Pna*21-SO2. (b) Crystal structure of *Pmc*21-SO2. (c) Static enthalpy differences relative to experimental *Aba*2 phase as a function of pressure for the predicted structures of SO2 at 0-50 GPa.


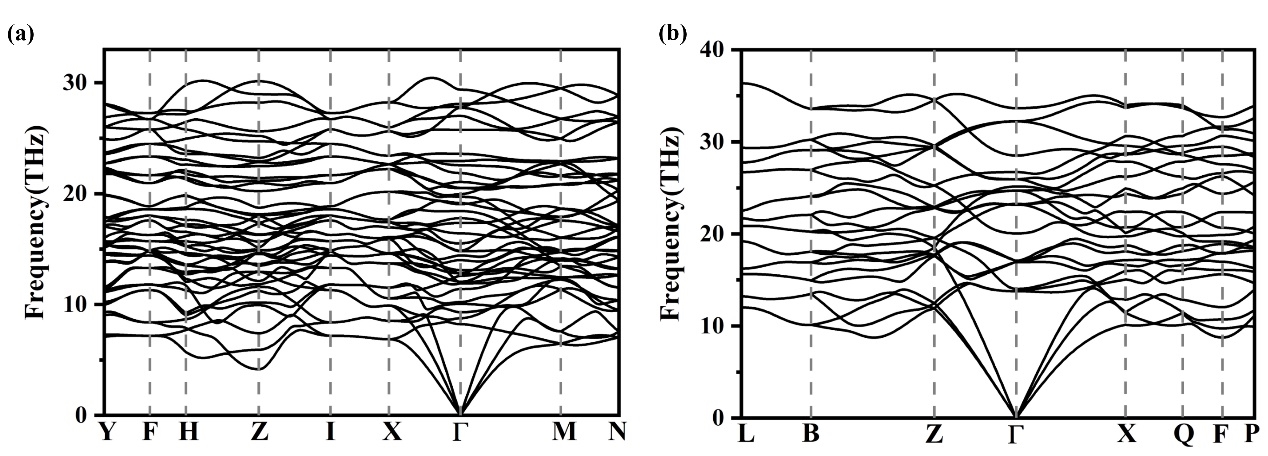


**Figure S4**. Dynamic stability of S3O4 and SO3. Phonon dispersion relations along select high-symmetry points in the Brillouin zone for (a) *C*2*/m*-S3O4 (b) -SO3 at 100 GPa.


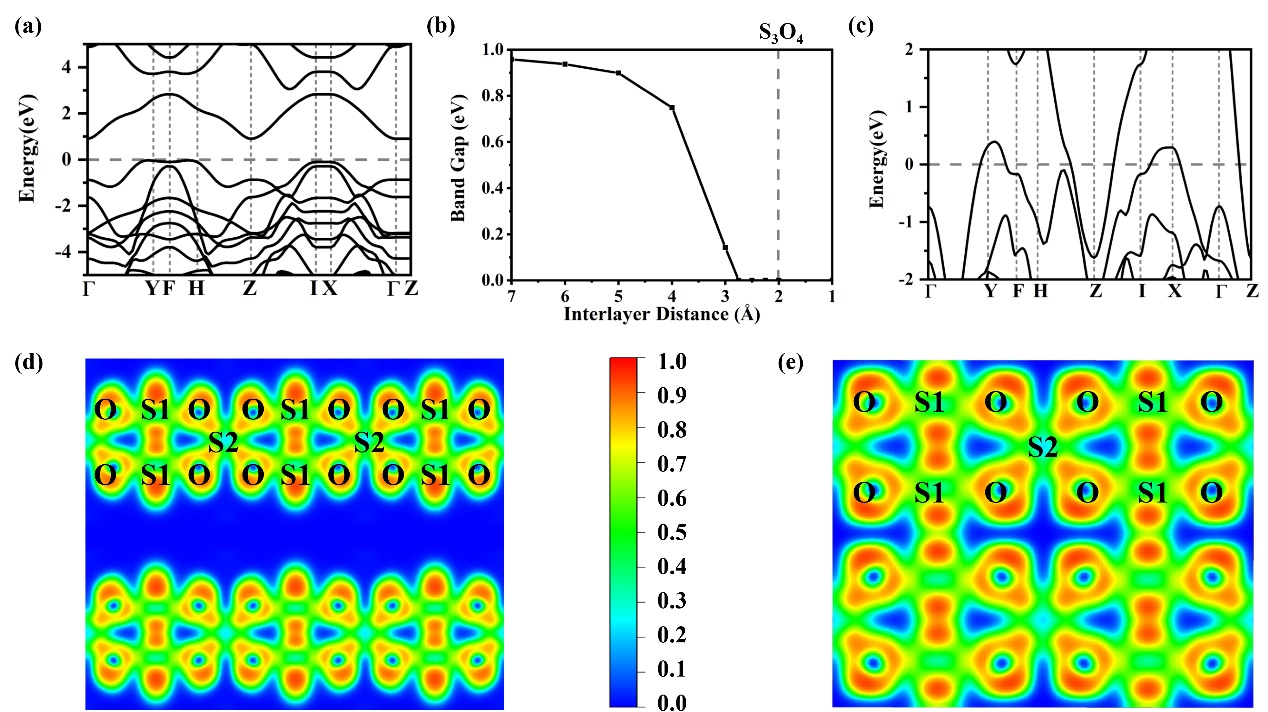


**Figure S5.** (a) Band structure of the S3O4 with 10 Å interlayer distance. (b) The band gaps as a function of interlayer distance. (c) Band structure of the S3O4. The horizontal dashed line indicated the Fermi energy level. Calculated ELF in (100) plane of (d) S3O4 with 5 Å interlayer distance and (e) S3O4 phase. The band gap strongly depends on interlayer distance. The S3O4 shows insulating character when the interlayer distance is larger than 2.75 Å. Interestingly, reducing interlayer distance makes part of electrons in the layer transfer into the interlayer regions, enhancing the delocalized degree of electrons and resulting in the metallization.


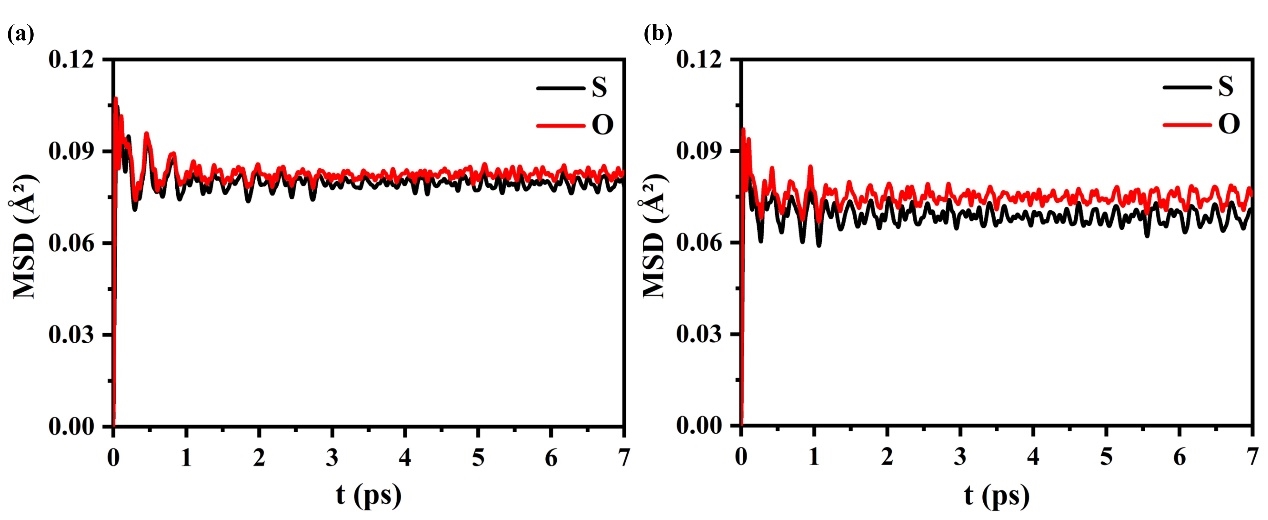


**Figure S6.** Calculated mean-square-deviation (MSD) of S and O in S3O4 at 2,000 K at (a) 80 GPa and (b)100 GPa.


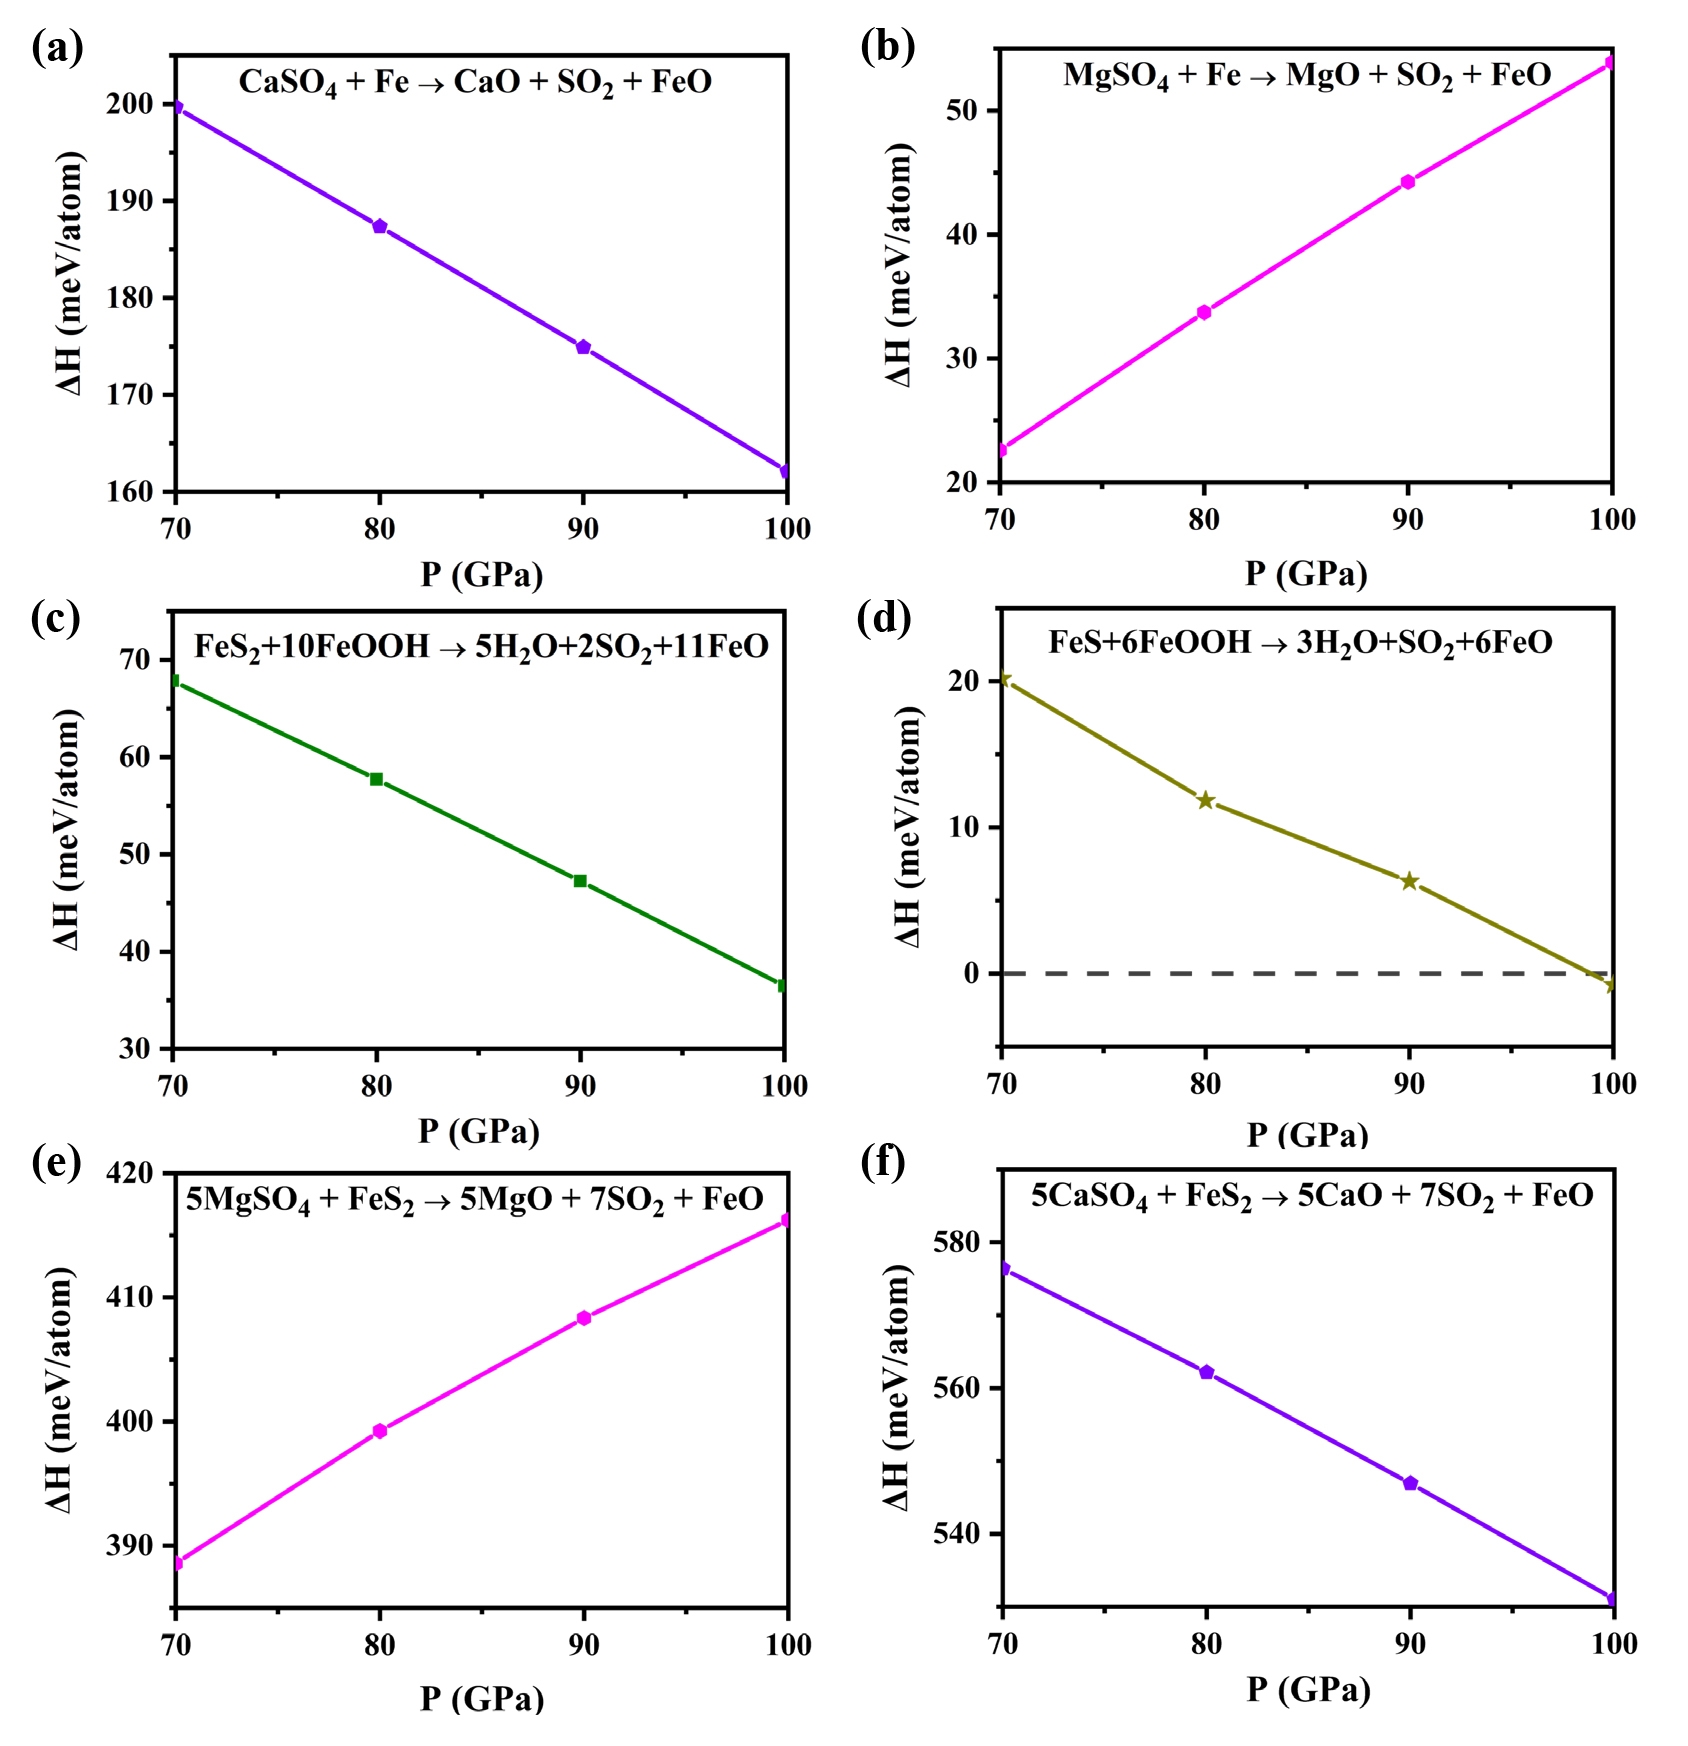


**Figure S7.** Relative enthalpy of ﻿the some reactions at high pressure. (a-f) The positive reaction enthalpies demonstrate that the reactions involving sulfates (CaSO4/MgSO4) and sulfides (FeS2/FeS) cannot directly produce SO2 at low pressure.





**Figure S8**. Volumes as function of pressure for *Rc*-SO3 calculated by PAW of VASP and all-electron potential of WIEN2k. The relative error is nearly 2%, validating our calculations within the PAW.

**Table S1.** Detailed crystallographic information for the energetically stable structures of S-O compounds identified in our structure search.

| P(GPa) | System | Space  group | Lattice constants  (Å,°) | Atom | Atomic coordinates (Fractional) | | |
| --- | --- | --- | --- | --- | --- | --- | --- |
| X | Y | Z |
| 50 | SO2 | *Pmc*21 | *a*=4.4794  *b*=3.9383  *c*=5.6596 | S(2a) | 0.00000 | 0.74077 | -0.56433 |
| S(2b) | 0.50000 | 0.13662 | -0.45431 |
| O(2a) | 0.00000 | 0.62093 | -0.01845 |
| O(2b) | 0.50000 | 0.34177 | -0.24091 |
| O(4c) | 0.74985 | 0.13991 | -0.87690 |
| 100 | SO3 | *Rc* | *a*=3.9610  *b*=3.9610  *c*=10.7980 | S(6b) | 0.33333 | 0.66667 | -0.33333 |
| O(18e) | 0.34160 | 0.00000 | -0.25000 |
| 100 | S3O4 | *C*2*/m* | *a*=4.6818  *b*=5.5553  *c*=4.6304  *β*=119.1969 | S(4i) | 0.97725 | 0.00000 | 0.74981 |
| S(2b) | 0.00000 | 0.50000 | 0.00000 |
| O(8j) | 0.99654 | 0.69447 | 0.24908 |
| 10 | SO2 | *Pna*21 | *a*=5.8326  *b*=7.1641  *c*=3.3970 | S(4a) | -0.27598 | 0.59731 | -0.75029 |
| O(4a) | -0.33403 | -0.05263 | -0.04025 |
| O(4a) | -0.52563 | 0.32999 | -0.03386 |
